# Supplementary material for: MYC/BCL2/BCL6 triple hit and TP53 deletion in a case of high-grade B cell lymphoma receiving CAR T cell immunotherapy
Source: PubMed Central journal article supplement (PMC8173290; doi:10.1136/jitc-2020-002029), 2021-06-01

## Supplemental Figure.1

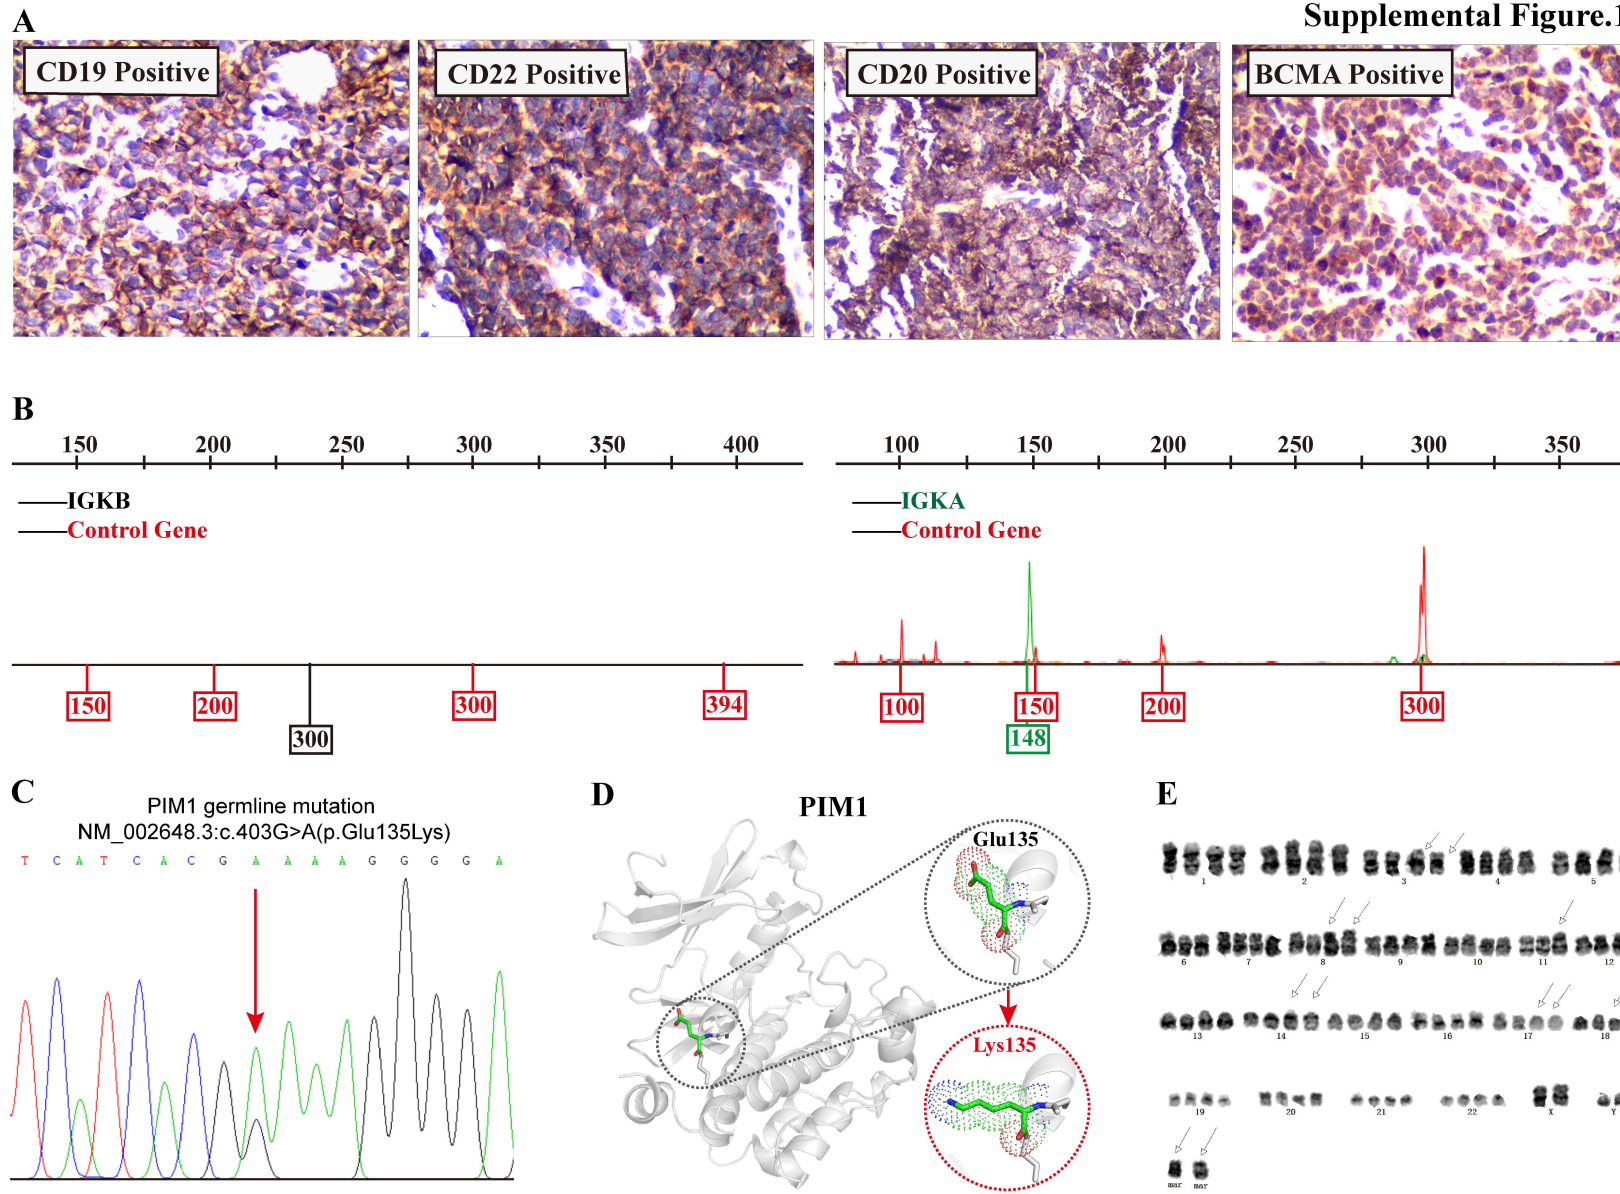

Supplement: jitc-2020-002029supp001.pdf [file jitc-2020-002029supp001.pdf]
