# Supplementary material for: MYC/BCL2/BCL6 triple hit and TP53 deletion in a case of high-grade B cell lymphoma receiving CAR T cell immunotherapy
Source: PubMed Central journal article supplement (PMC8173290; doi:10.1136/jitc-2020-002029), 2021-06-01
Supplement: jitc-2020-002029supp002.pdf [file jitc-2020-002029supp002.pdf]

**Supplemental Table 1** Brief chronology of key clinical events in this case

| <b>Time before and after CAR T cell therapy</b> | <b>Date</b>              | <b>Key events</b>                                                                                                                                                  |
|-------------------------------------------------|--------------------------|--------------------------------------------------------------------------------------------------------------------------------------------------------------------|
| -8.5 months                                     | 09/14/2018               | Diagnosis of DLBCL, GCB                                                                                                                                            |
| -8 months to -3 months                          | 09/19/2018 to 01/22/2019 | 6 cycles of <b><i>R-CHOP</i></b> (response evaluation: PD)                                                                                                         |
| -2.5 months                                     | 02/19/2019               | 1 cycle of <b><i>R-ESHAP</i></b> (response evaluation: PD)                                                                                                         |
| -3 weeks                                        | 03/15/2019               | 1 cycle of <b><i>ICE</i></b>                                                                                                                                       |
| -9 days to -1 day                               | 04/25/2019 to 05/01/2019 | Lymphocytes collection and myeloablative chemotherapy regimen ( <b><i>BEAM</i></b> )                                                                               |
| 0 day                                           | 05/02/2019               | <b><i>ASCT</i></b>                                                                                                                                                 |
| +6 day                                          | 05/08/2019               | <b><i>Murine anti-CD22 CAR T cell therapy</i></b> (2.77 x 10 <sup>6</sup> cells/kg)                                                                                |
| +7 day                                          | 05/09/2019               | <b><i>Murine anti-CD19 CAR T cell therapy</i></b> (2.50 x 10 <sup>6</sup> cells/kg)                                                                                |
| +1.5 month                                      | 06/27/2019               | Response evaluation by CT : SD                                                                                                                                     |
| +2 months                                       | 07/12/2019               | Response evaluation by PET/CT : PD                                                                                                                                 |
| +2.5 months to +3 months                        | 07/19/2019 to 08/11/2019 | <b><i>Sintilimab Injection</i></b> (an anti PD-1 antibody) plus novel immunotherapeutic drugs ( <b><i>rituximab, chidamide, bortezomib and dexamethasone</i></b> ) |
| +5 months                                       | 10/02/2019 to 10/06/2019 | Lymphodepleting chemotherapy regimen ( <b><i>FC</i></b> ) and <b><i>human anti-BCMA CAR T cell therapy</i></b>                                                     |
| +6 months                                       | 11/05/2019               | Response evaluation by PET/CT : PD                                                                                                                                 |
